# Supplementary material for: Tuning the thermoresponsive properties of PEG-based fluorinated polymers and stimuli responsive drug release for switchable 19F magnetic resonance imaging
Source: Royal Society of Chemistry journal article supplement (doi:10.1039/d1py00602a), 2021-01-01
Supplement: d1py00602a1.pdf [file d1py00602a1.pdf]

## Supporting information

### Tuning the Thermoresponsive Properties of PEG-Based Fluorinated Polymers and Stimuli Responsive Drug Release for Switchable $^{19}\text{F}$ Magnetic Resonance Imaging

Adil Usman,<sup>a,b</sup> Cheng Zhang,<sup>a,b</sup> Jiacheng Zhao,<sup>a,b</sup> Hui Peng,<sup>a,b</sup> Nyoman D. Kurniawan,<sup>c</sup> Changkui Fu,<sup>a,b</sup> David J. T. Hill,<sup>a,d</sup> and Andrew K. Whittaker<sup>\*a,b</sup>

<sup>a</sup>Australian Institute for Bioengineering and Nanotechnology, The University of Queensland, St Lucia, QLD 4072, Australia, <sup>b</sup>ARC Centre of Excellence in Convergent Bio-Nano Science and Technology, The University of Queensland, St Lucia, QLD 4072, Australia, <sup>c</sup>Centre for Advanced Imaging, The University of Queensland, St Lucia, QLD 4072, Australia, <sup>d</sup>School of Chemistry and Molecular Biosciences, The University of Queensland, St Lucia, QLD 4072, Australia.

Email: [a.whittaker@uq.edu.au](mailto:a.whittaker@uq.edu.au)

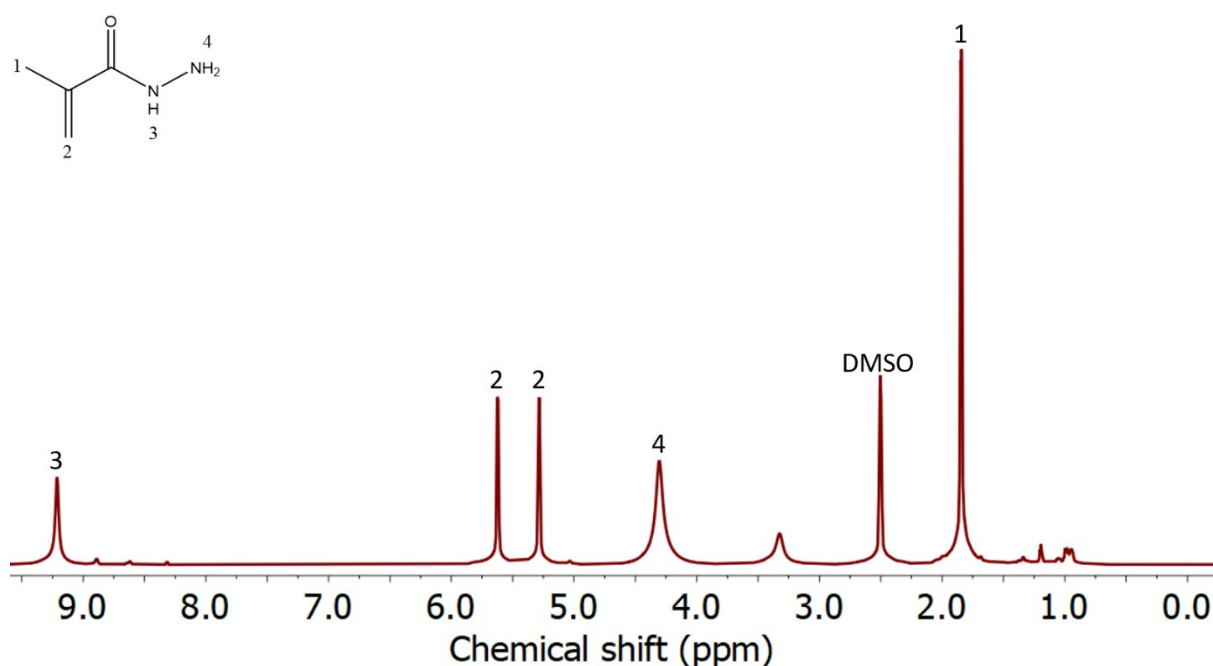

Figure S1  $^1\text{H}$  NMR spectrum of methacryloyl hydrazide monomer in DMSO.

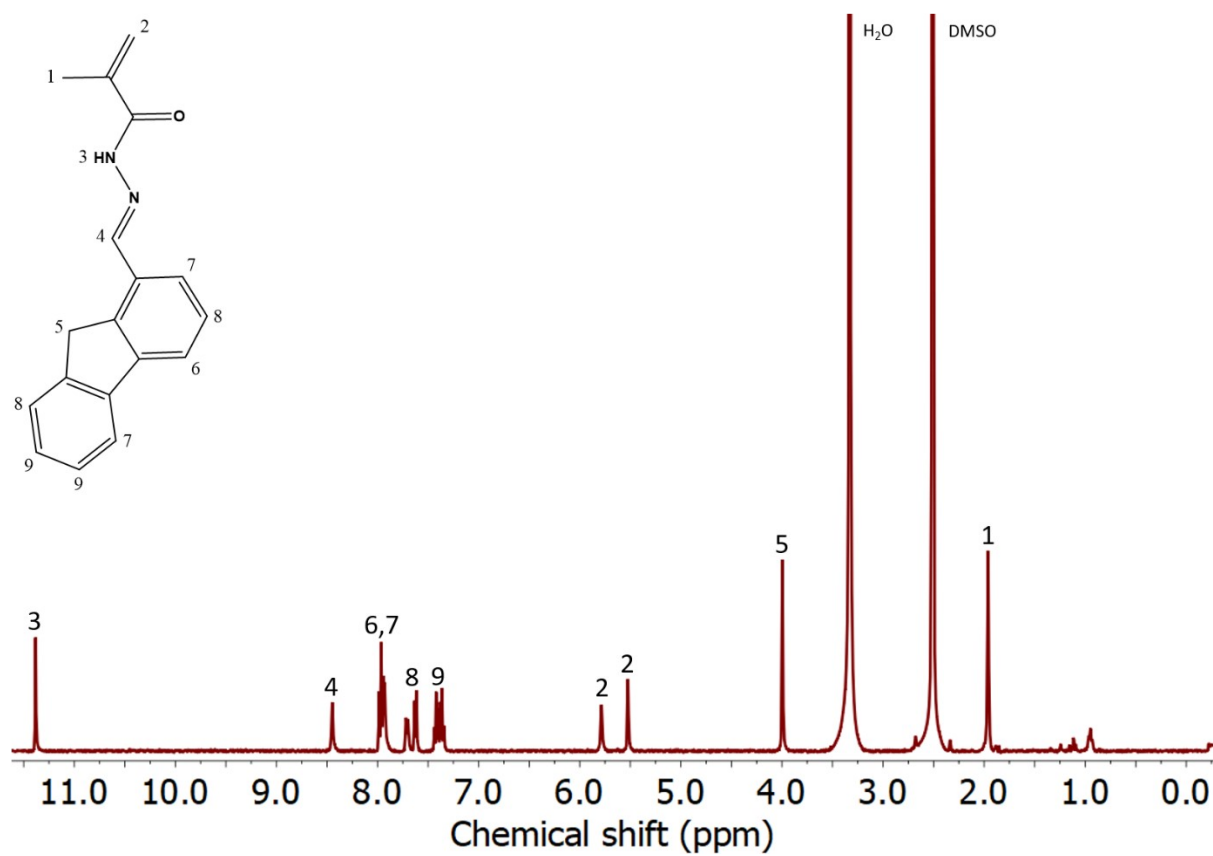

Figure S2  $^1\text{H}$  NMR spectrum of fluorene-2-carboxaldehyde conjugated hydrazide (DAH) monomer in DMSO.

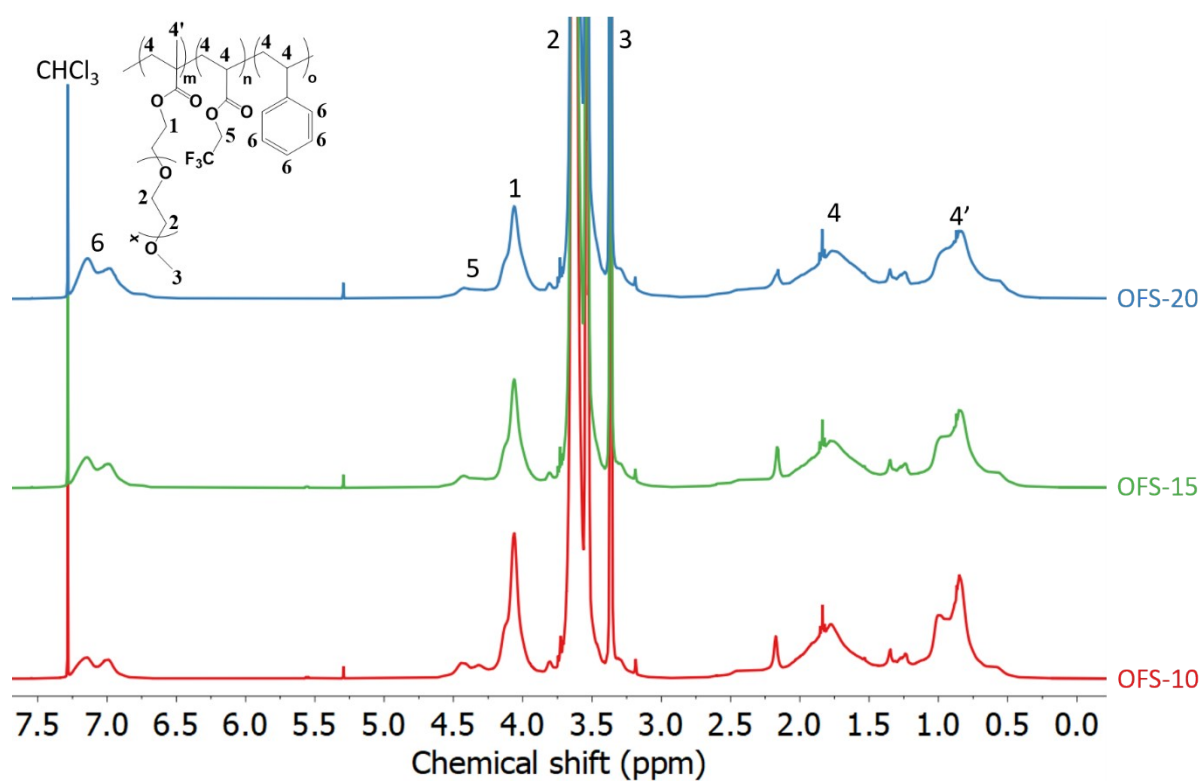

Figure S3  $^1\text{H}$  NMR spectra of OFS-10, 15 and 20 terpolymers and assignments to the peaks in  $\text{CDCl}_3$  at 298 K.

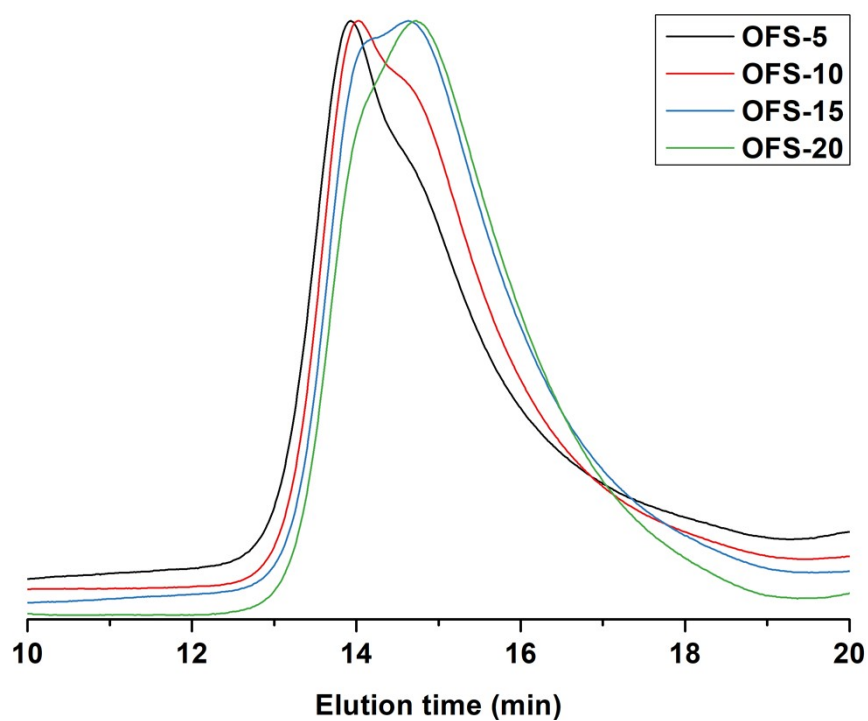

Figure S4 SEC curves of OFS terpolymers in THF.

Table S1 Tables representing the hydrodynamic diameters of OFS polymers in water as a

| OFS-5 |        | OFS-10 |        | OFS-15 |        | OFS-20 |        |
|-------|--------|--------|--------|--------|--------|--------|--------|
| Temp  | d (nm) | Temp   | d (nm) | Temp   | d (nm) | Temp   | d (nm) |
| 298   | 12.46  | 298    | 10.73  | 296    | 9.766  | 293    | 11.29  |
| 301   | 12.78  | 301    | 10.89  | 298    | 11.31  | 295    | 165.5  |
| 303   | 12.85  | 303    | 11.22  | 300    | 11.39  | 297    | 191.6  |
| 305   | 13.09  | 305    | 11.74  | 302    | 18.66  | 299    | 223.4  |
| 307   | 13.72  | 307    | 13.03  | 304    | 1199   | 301    | 3651   |
| 309   | 14.81  | 309    | 3255   | 306    | 4595   | 303    | 6794   |
| 311   | 17.23  | 311    | 4090   | 308    | 6644   | 305    | 8818   |
| 313   | 1343   | 313    | 9768   | 310    | 7386   | 307    | 10030  |
| 315   | 8656   | 315    | 10220  | 312    | 9141   | 309    | 13470  |
| 317   | 9901   | 317    | 11270  | 314    | 11170  | 311    | 14320  |
| 319   | 11970  | 319    | 11790  | 316    | 11190  | 313    | 15860  |
| 321   | 13020  | 321    | 12150  |        |        |        |        |
| 323   | 13340  |        |        |        |        |        |        |
| 325   | 13540  |        |        |        |        |        |        |

function of temperature.

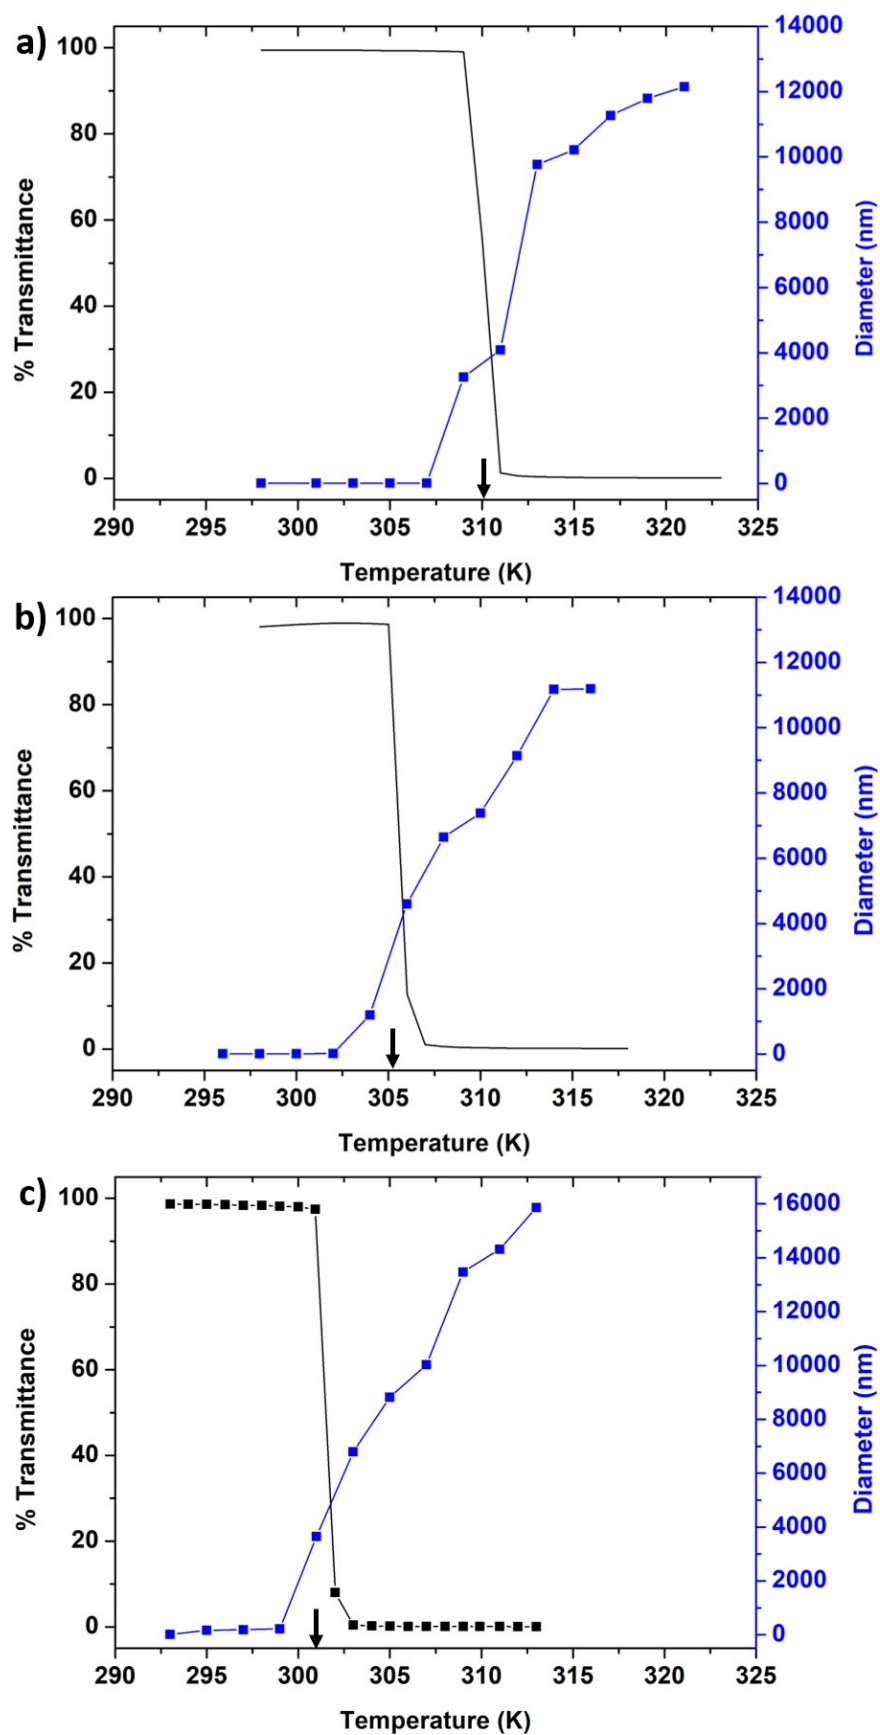

Figure S5 Hydrodynamic diameter of a) OFS-10, b) OFS-15 and c) OFS-20 in water as function of temperature. The arrows represent the LCST.

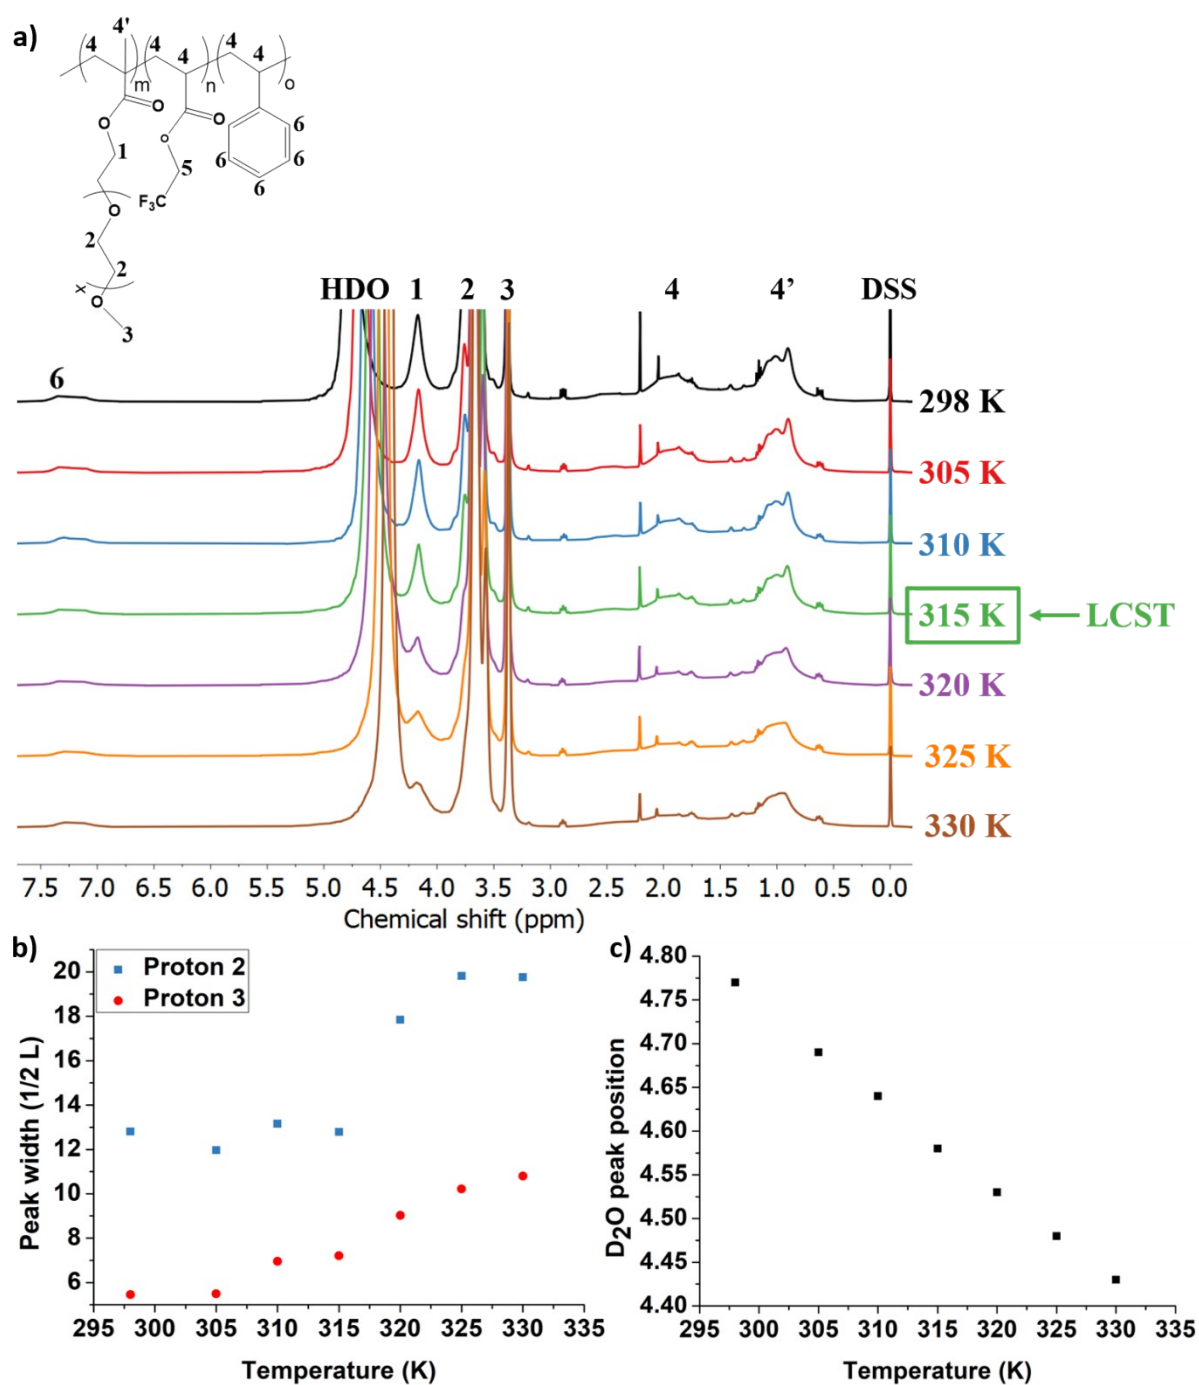

Figure S6 a) <sup>1</sup>H NMR spectra of OFS-5 terpolymer in D<sub>2</sub>O b) plot representing increase in maximum width at half length for protons 3 and 2 and c) plot representing shifting of HDO peak at increasing temperature intervals from 298-330 K.

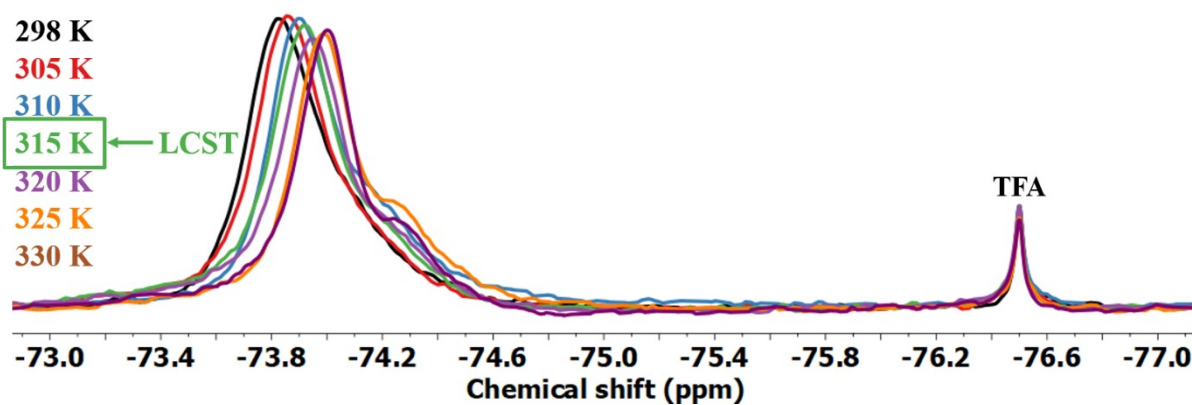

Figure S7  $^{19}\text{F}$  NMR spectra of OFS-5 terpolymer in  $\text{D}_2\text{O}$  at increasing temperature intervals from 298-330 K.

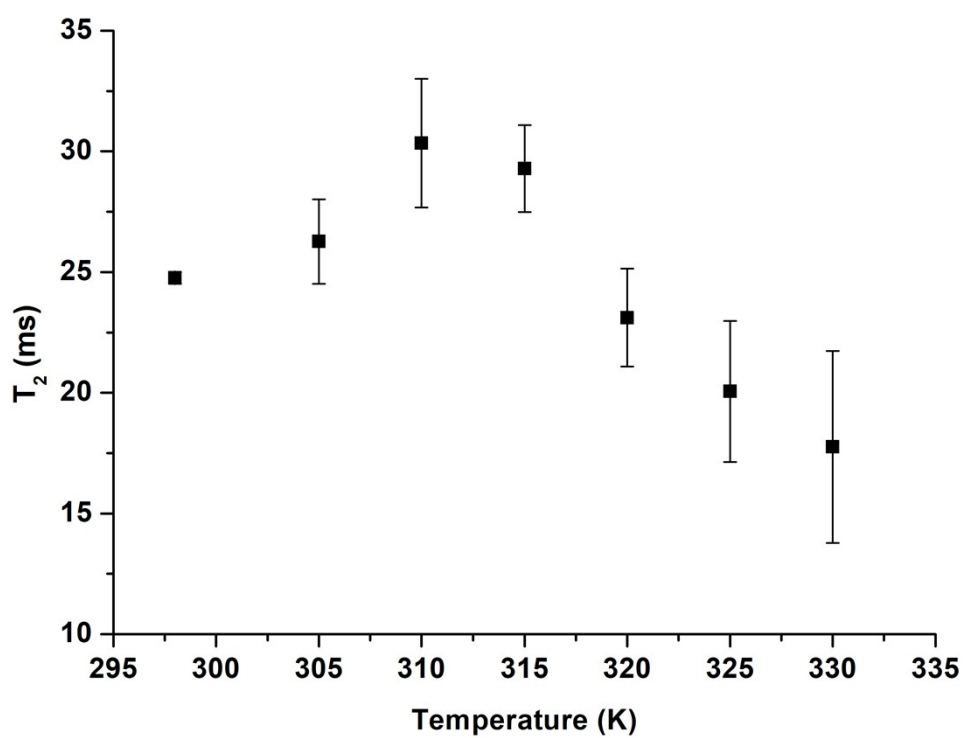

Figure S8  $^{19}\text{F}$   $T_2$  relaxation times versus temperature for OFS-5.

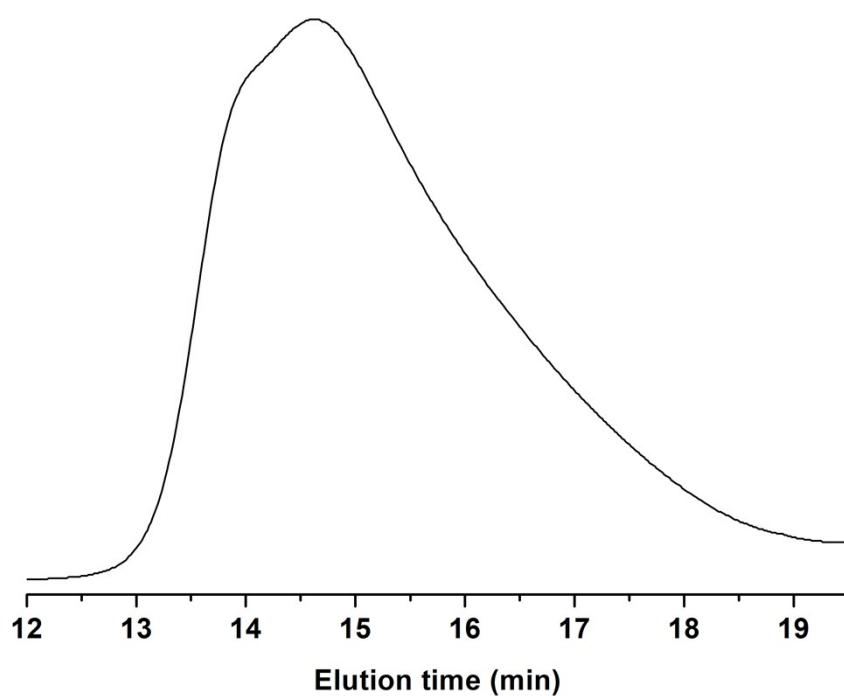

Figure S9 SEC curve of OFD terpolymer in THF.

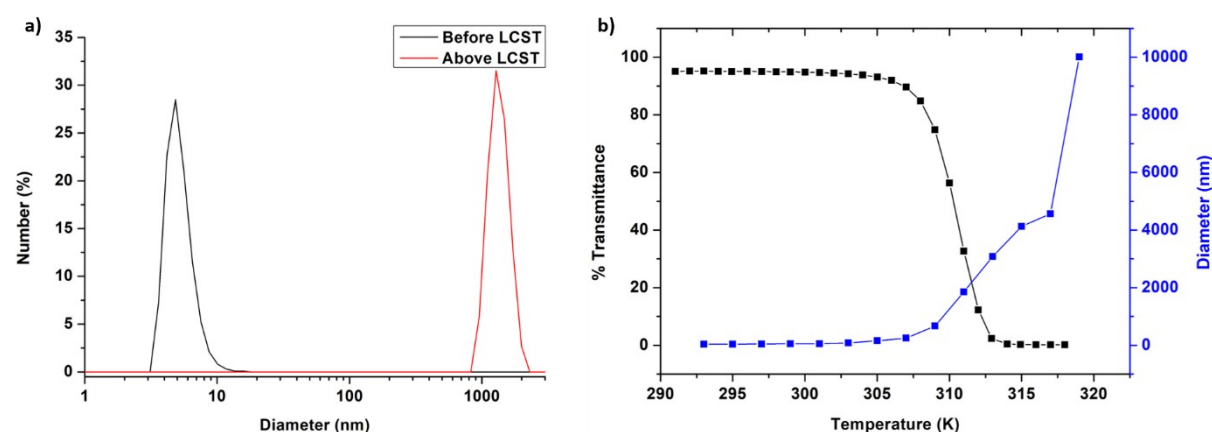

Figure S10 Number average hydrodynamic diameter of OFD terpolymer a) in water below and above the LCST and b) optical transmittance and hydrodynamic diameter plotted as function of temperature.

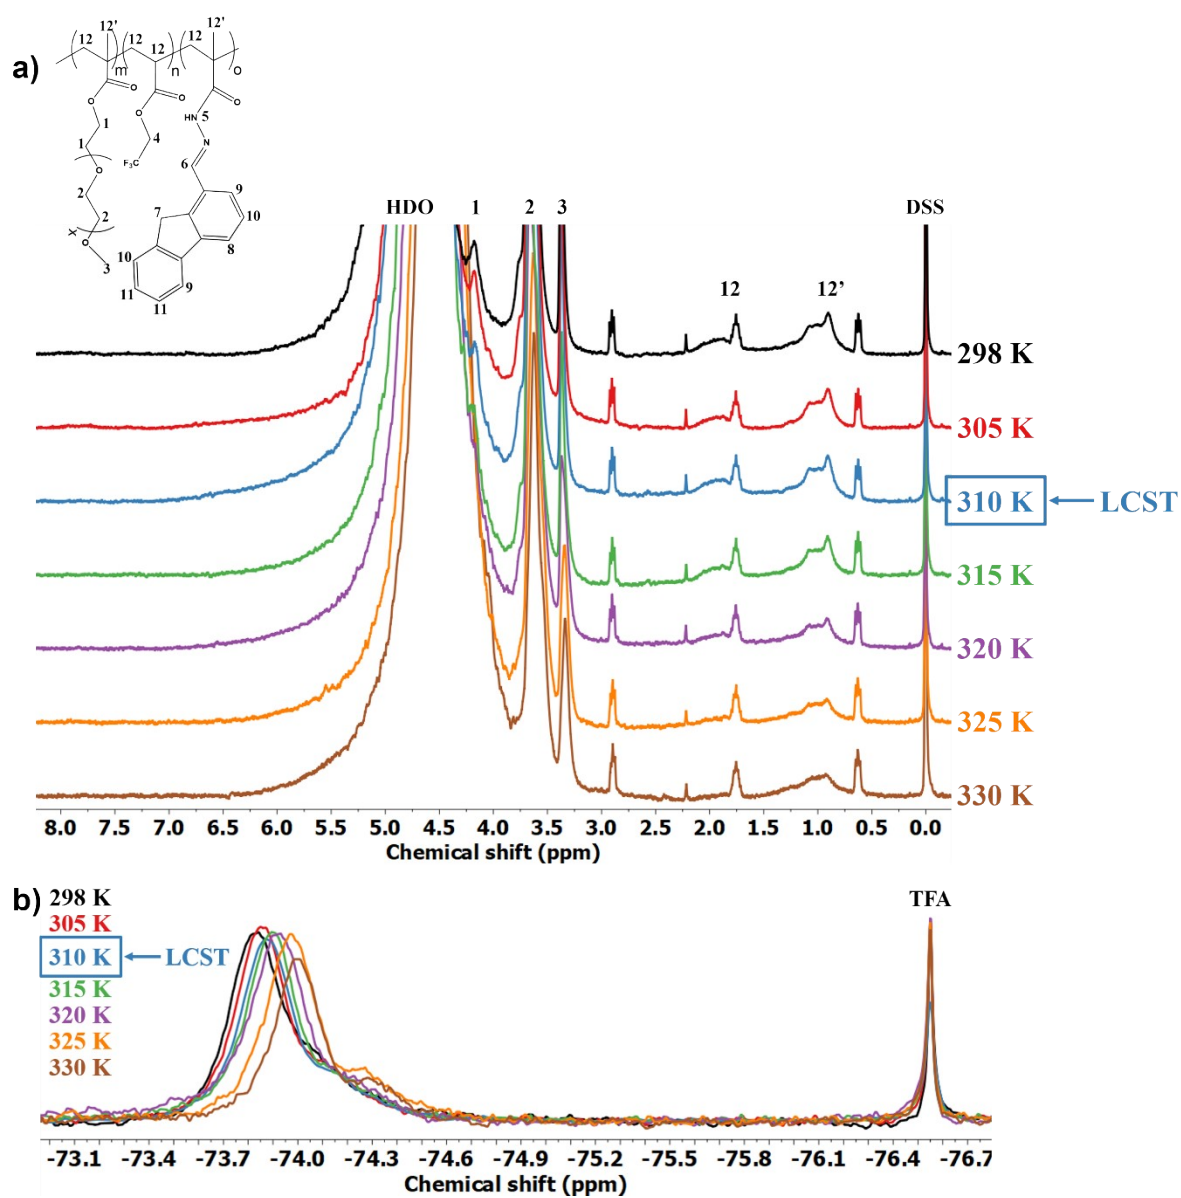

Figure S11 a)  $^1H$  and b)  $^{19}F$  NMR spectra of OFD terpolymer in  $D_2O$  at increasing temperature intervals from 298-330 K.

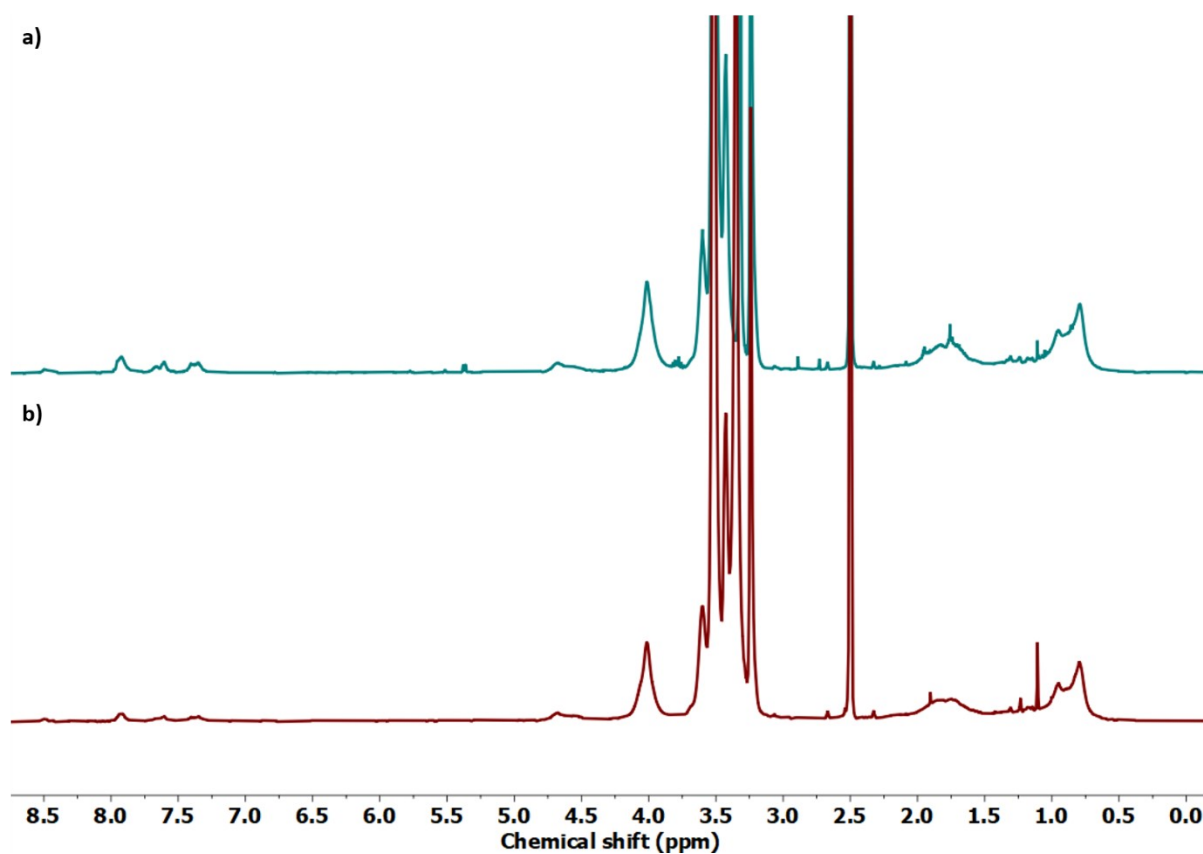

Figure S12  $^1\text{H}$  NMR spectra of OFD terpolymer in DMSO a) before and b) after drug release by hydrazone cleavage. The drug release is quantified by indexing the PEG peak at 4 ppm.

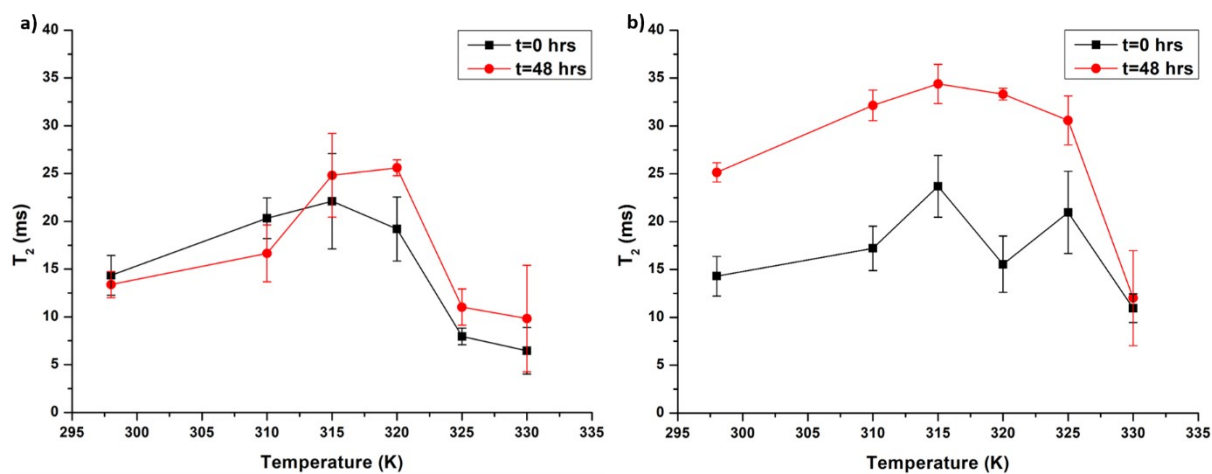

Figure S13  $^{19}\text{F}$   $T_2$  relaxation times of OFD terpolymer solutions in a) pH 7.4 and b) 5.5 PBS buffer before and after incubation at different temperatures.
